# Supplementary material
Source: publisher figshare collection journal article supplement (https://future-science-group.figshare.com/articles/dataset/_/17024993)

# Spleen

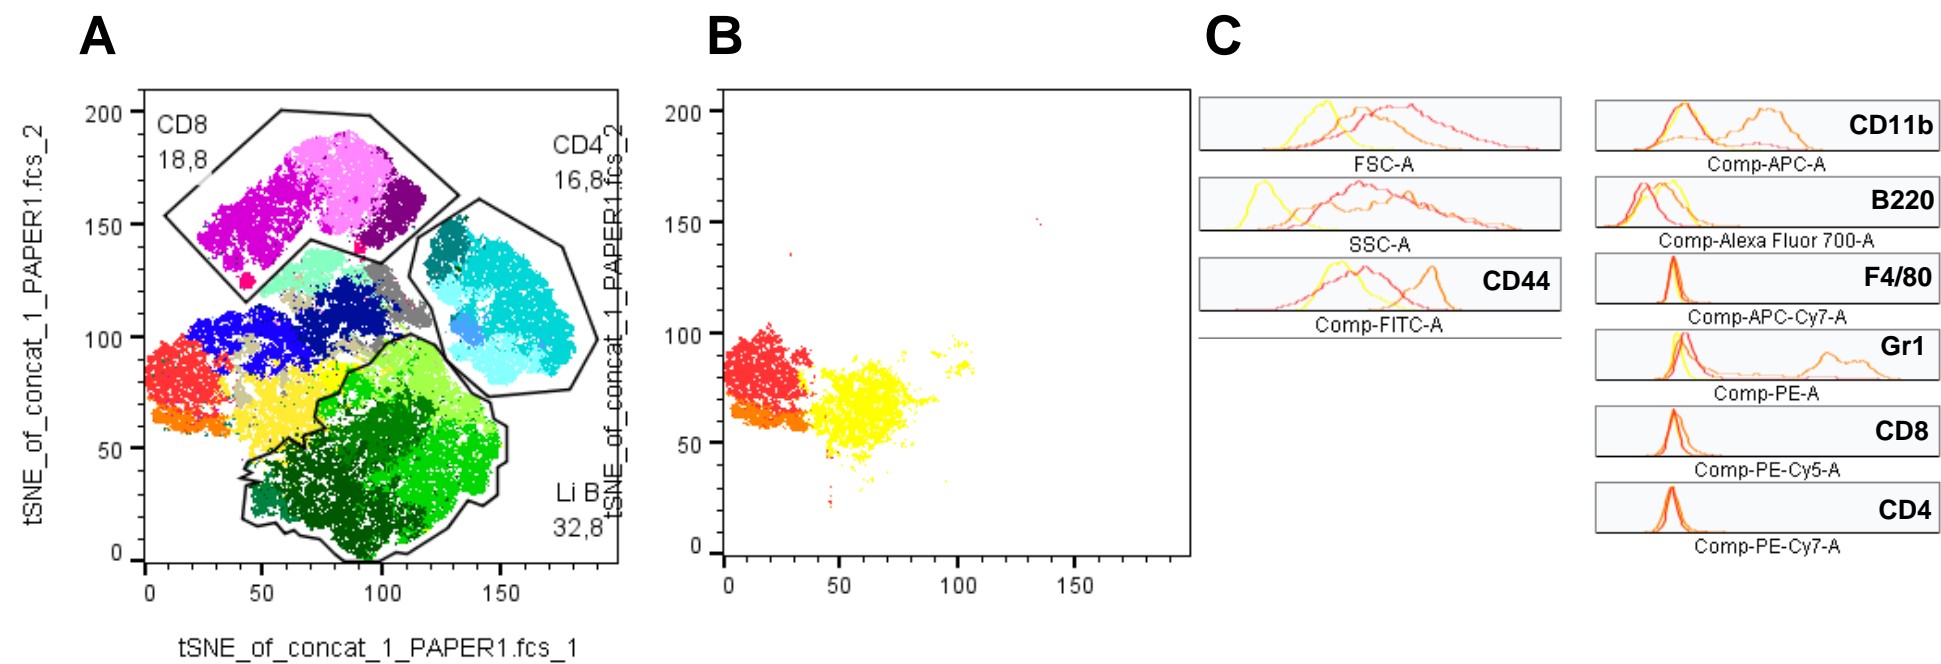

Supplement: Supplementary file 1 [file 1]

Suppl. Figure 10

Tumor

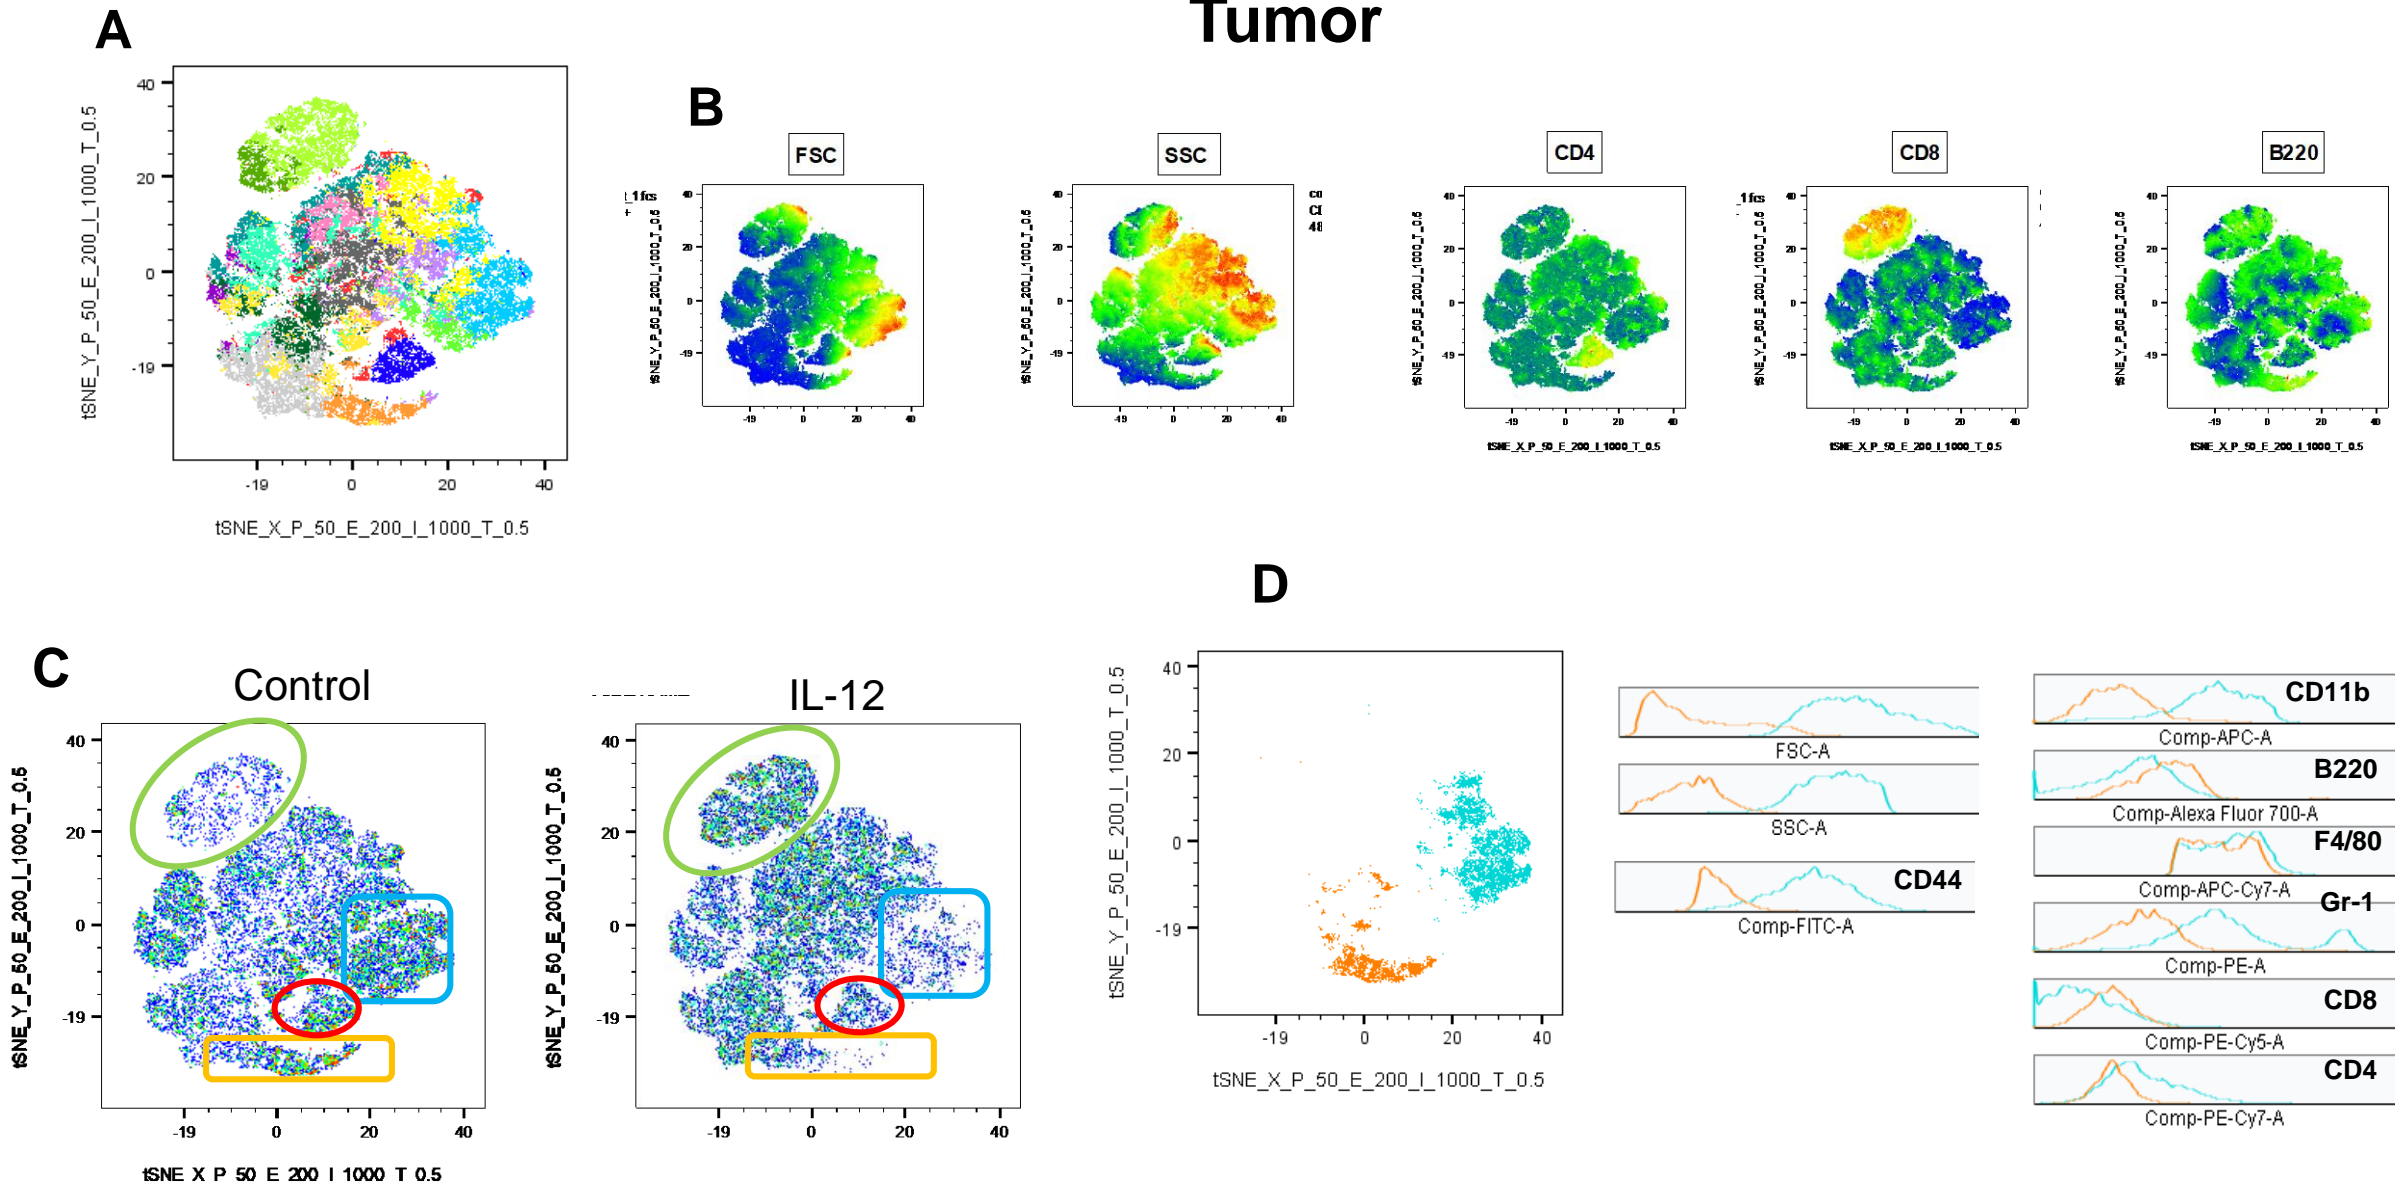

Supplement: Supplementary file 2 [file 1]

# Suppl. Figure 11

## EL4 tumor

A

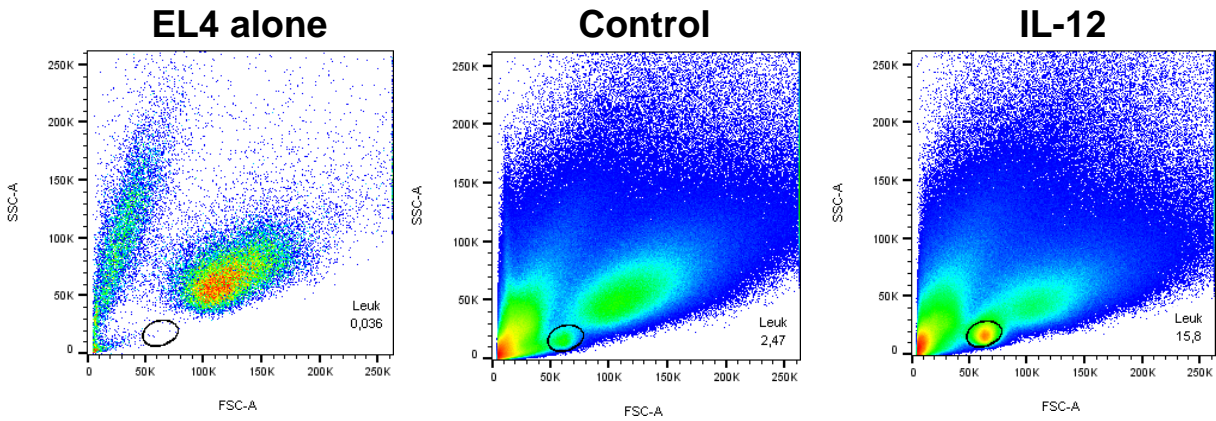

B

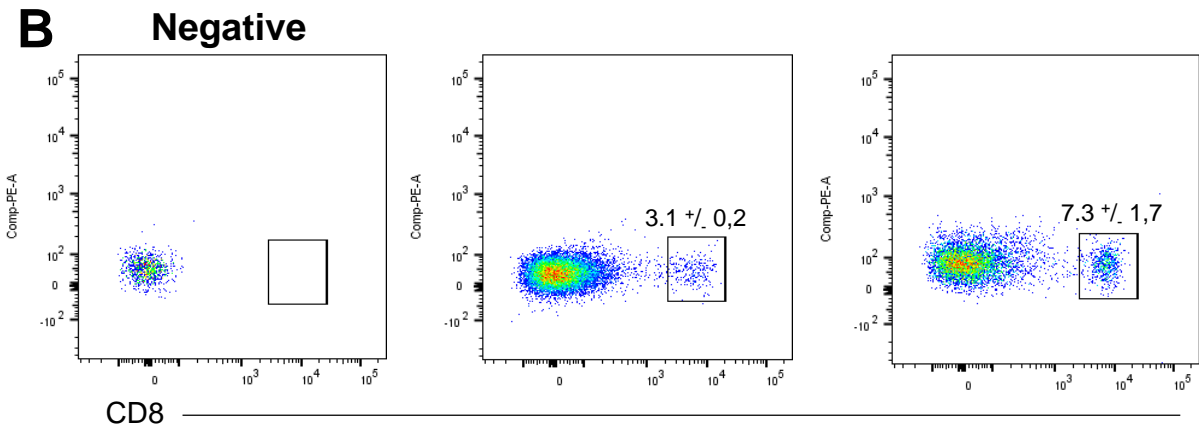

C

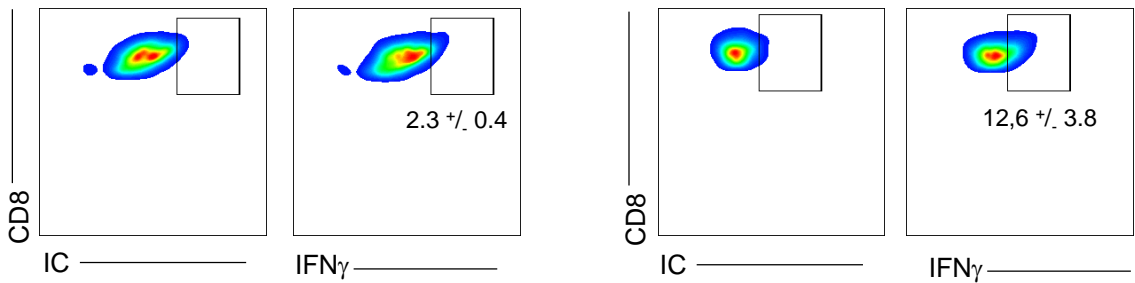

Supplement: Supplementary file 3 [file 1]

Suppl. Figure 7

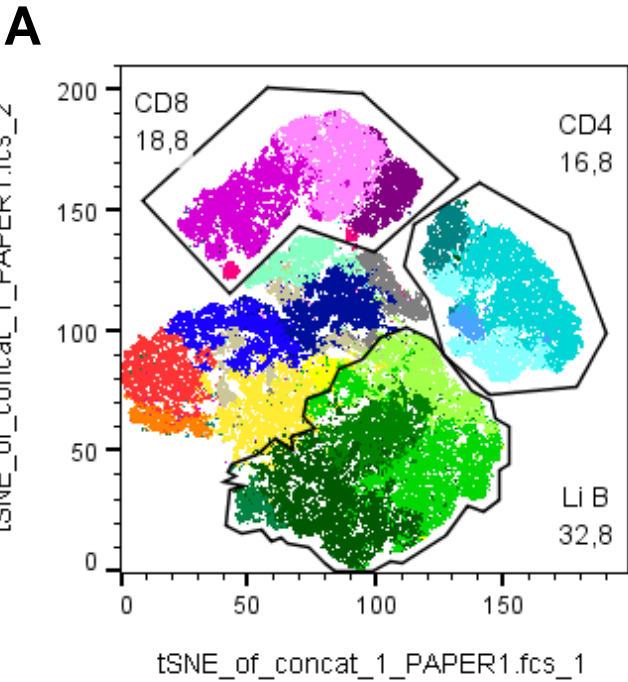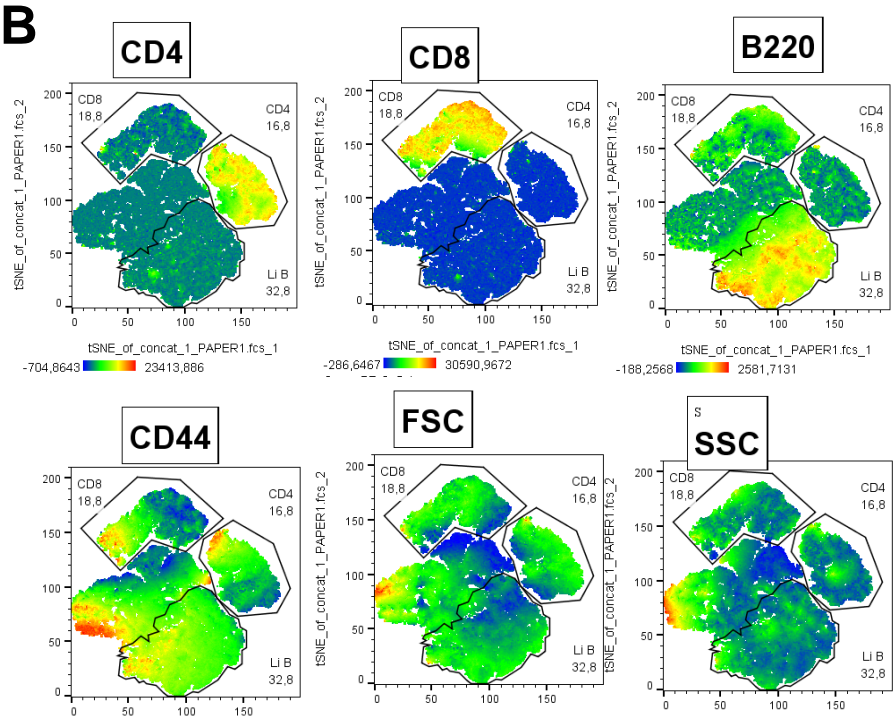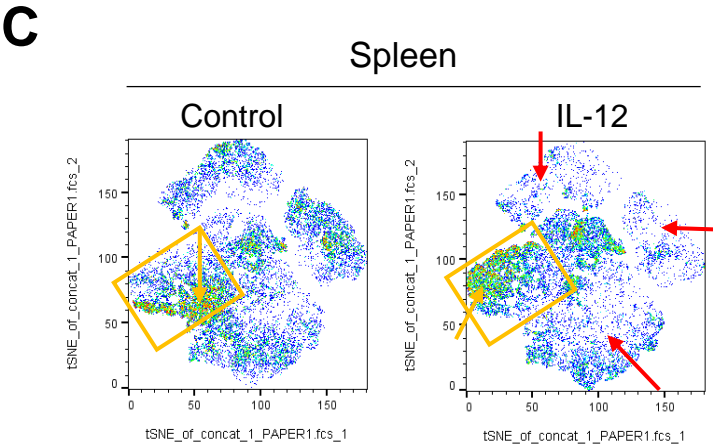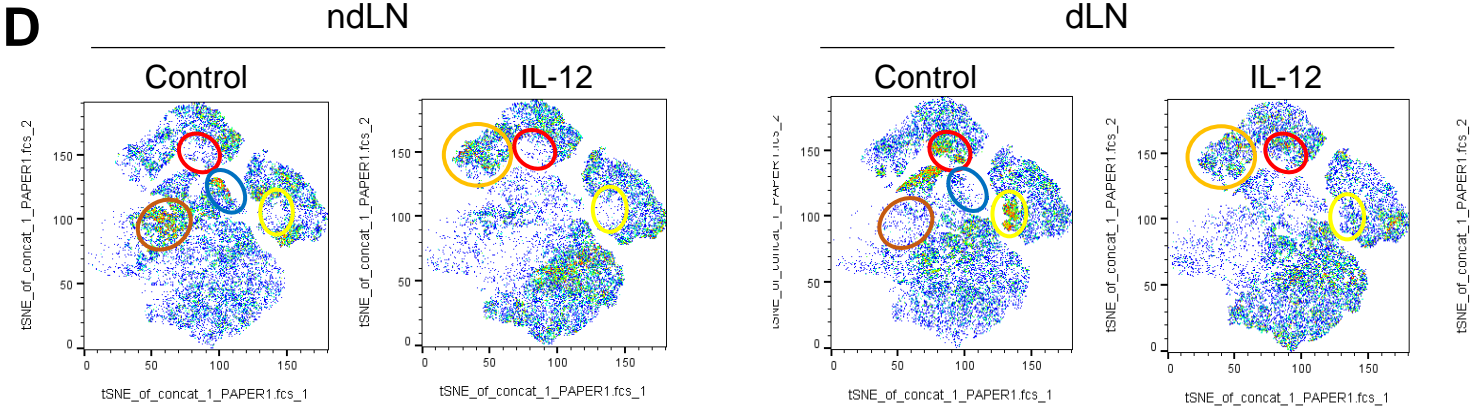

Supplement: Supplementary file 4 [file 1]

Suppl. Figure 9

dLN and ndLN

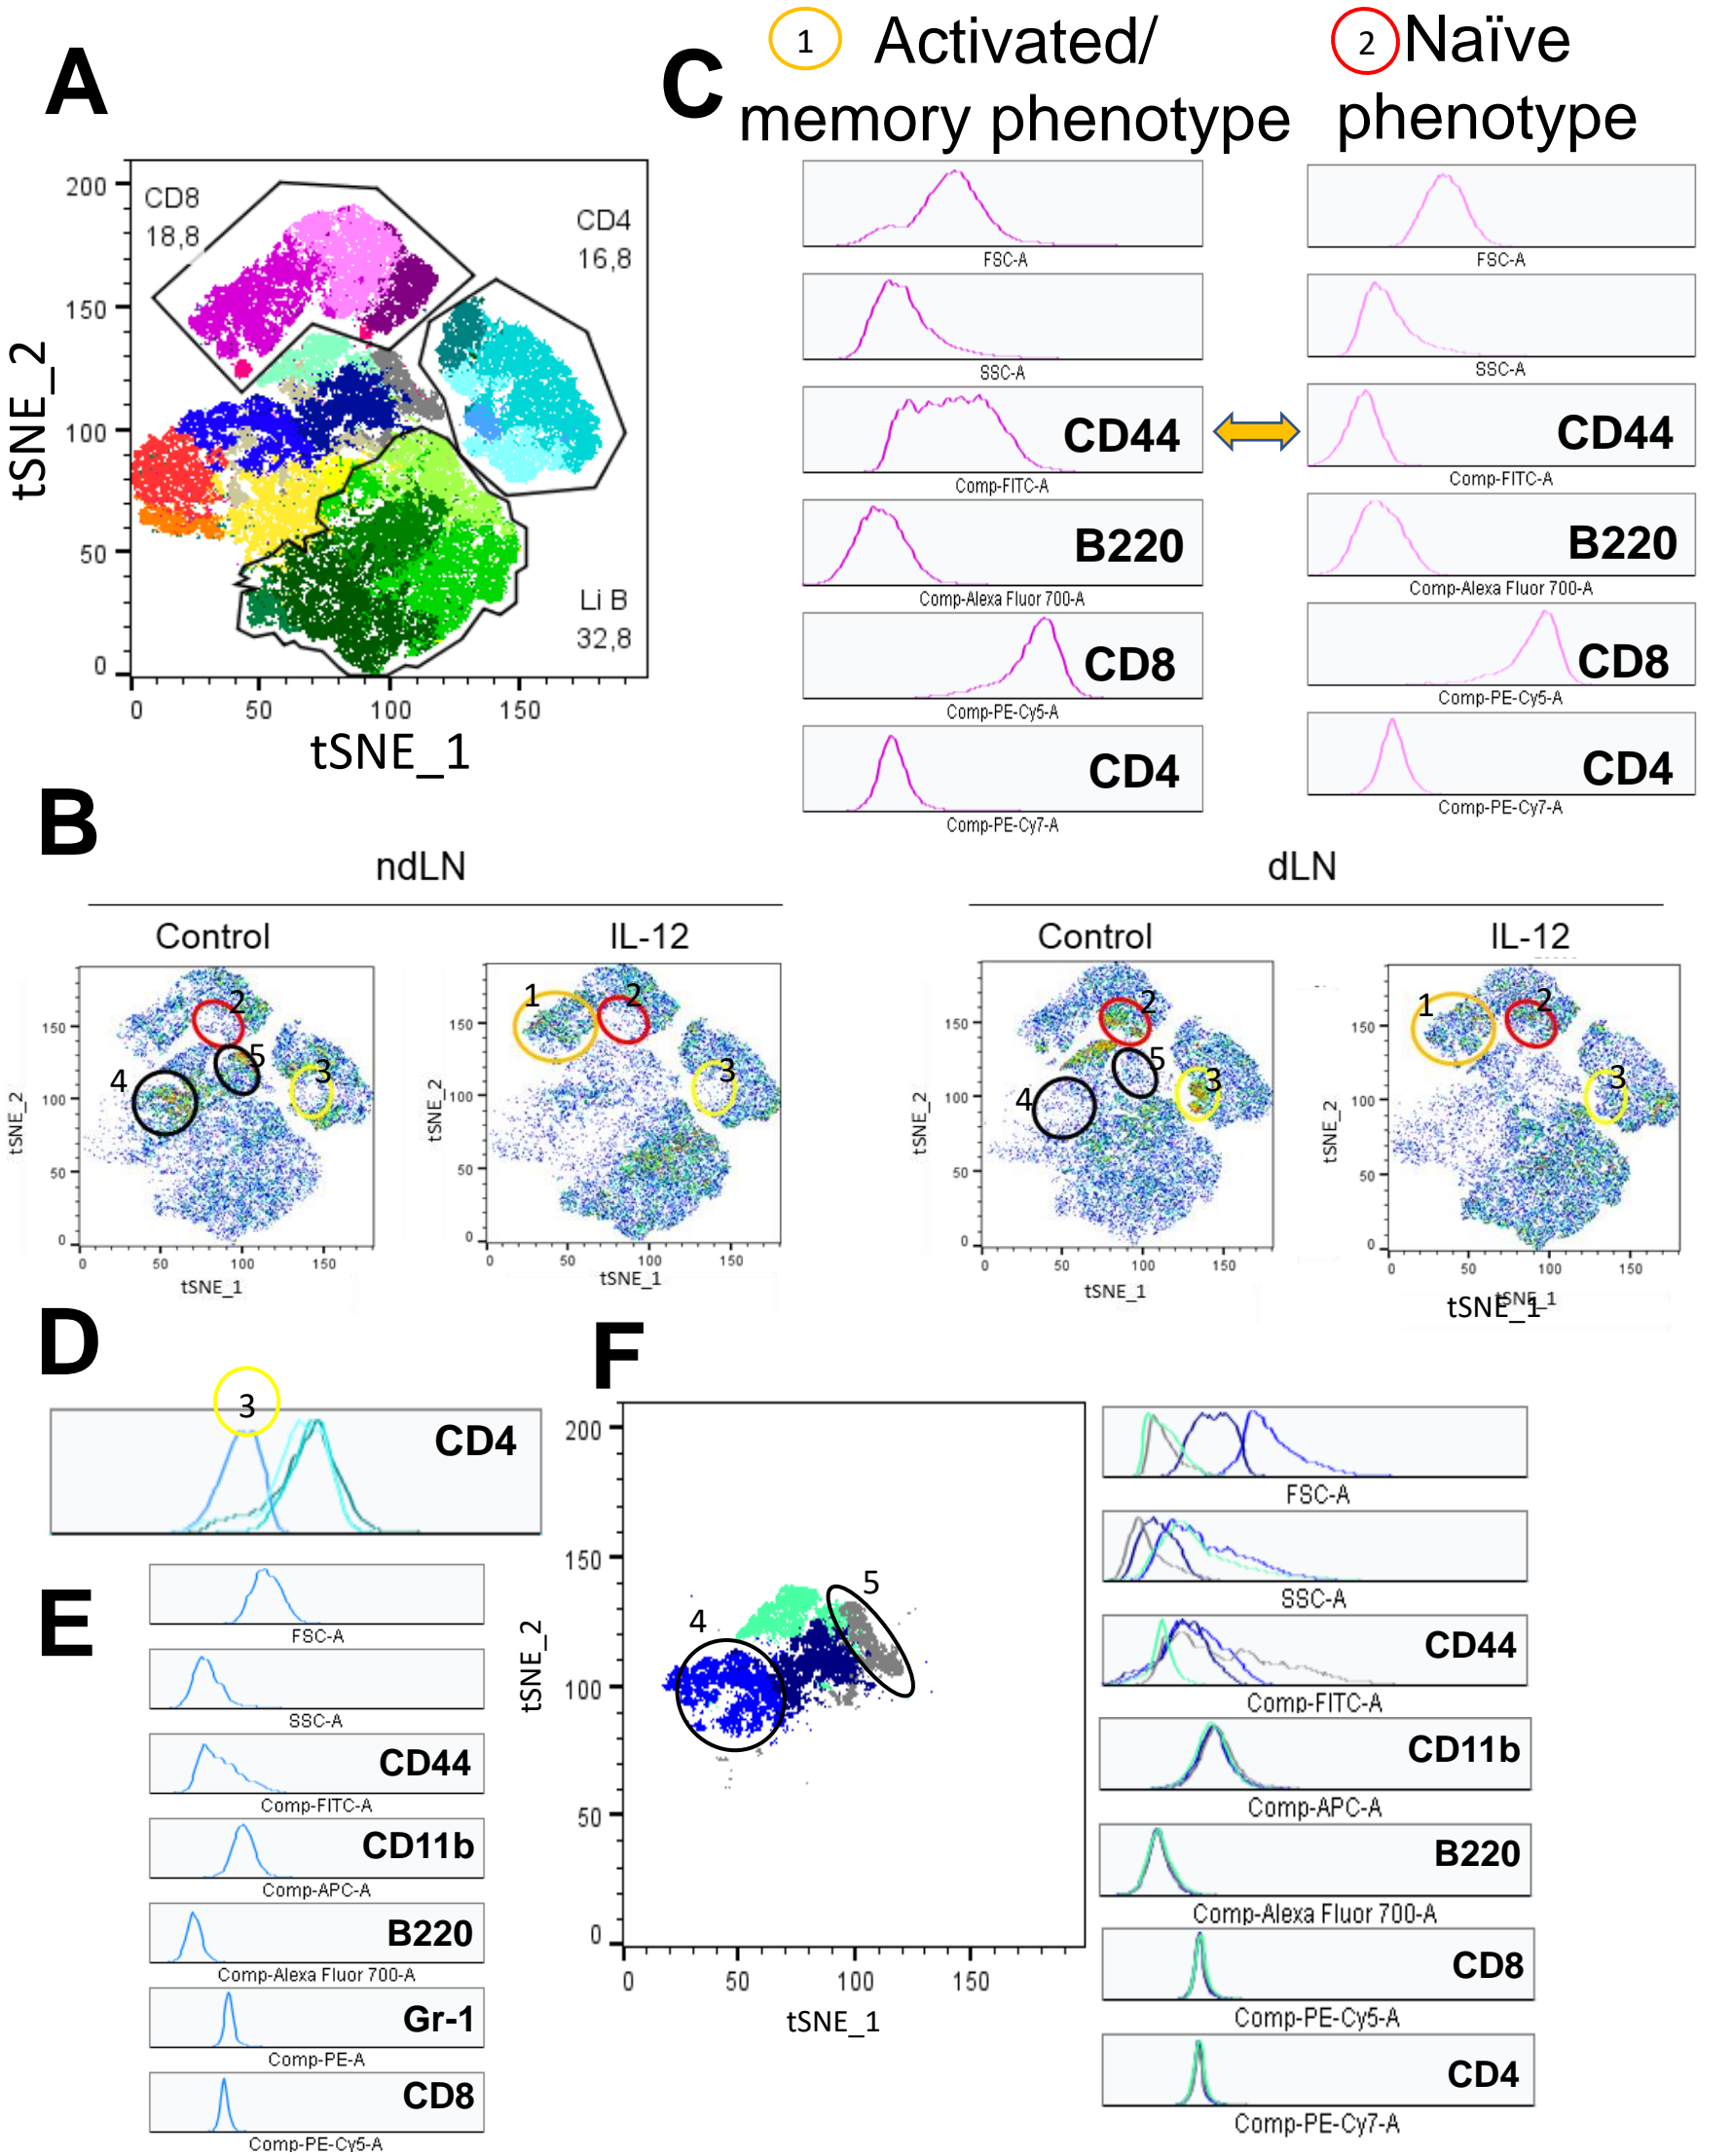

Supplement: Supplementary file 5 [file 1]
